# Supplementary material for: Wnt Drug Discovery: Weaving Through the Screens, Patents and Clinical Trials
Source: PubMed Central journal article supplement (PMC5040984; doi:10.3390/cancers8090082), 2016-09-01
Supplement: cancers-08-00082-s001.pdf [file cancers-08-00082-s001.pdf]

Supplementary Table 1: USPTO Patent and Patent Applications  
Ligand and Receptor Interface P/PA

| Compound/Category   | Title or Example Thereof for Multiple Patents                                                                                      | Inhibitor or Enhancer | Molecular target                   | Assignee                                                                                  | Patents and/or Patent Applications                                      |
|---------------------|------------------------------------------------------------------------------------------------------------------------------------|-----------------------|------------------------------------|-------------------------------------------------------------------------------------------|-------------------------------------------------------------------------|
| Dkk protein         | Therapeutic implications of dickkopf affecting cancer stem cell fate                                                               | Inhibition            | LRP5/6                             | Institute for Medical Biomathematics                                                      | 8762069                                                                 |
| Dkk protein         | Use of WNT inhibitors to augment therapeutic index of chemotherapy                                                                 | Inhibition            | LRP5/6                             | The Board of Trustees of the Leland Stanford Junior University                            | 7803783                                                                 |
| Dkk protein         | Human Zven1 DNA, Peptides and polypeptides and Antibodies that bind human Zven1                                                    | Inhibition            | Wnt ligands                        | ZymoGenetics Inc                                                                          | 6485938, 6756479, 6828425, 7122349, 7179787, 7662641, 7691585, 7691610, |
| Dkk genes           | Inhibitor protein of the wnt signal pathway                                                                                        | Inhibition            | Wnt ligands/<br>LRP5/6<br>receptor | Deutsches Krebsforschungszentrum<br>Stiftung des Offentlichen Rechts                      | 6844422, 7138508, 8461309,<br>8536311                                   |
| DKK inhibitor       | Composition of tumor-associated peptides and related anti-cancer vaccine for the treatment of glioblastoma (GBM) and other cancers | Enhancer              | Dkk1                               | Immatics Biotechnologies GmbH                                                             | 8895514, 8653035, 8961985,<br>20150125478,                              |
| Dkk protein         | Prokaryotic expression of soluble, active Dkk                                                                                      | Inhibition            | LRP5/6                             | St. Jude Children's Hospital                                                              | 8470554                                                                 |
| Dkk protein         | Human dickkopf-related protein and nucleic acid molecules and uses therefor                                                        | Inhibition            | Wnt ligands/<br>LRP5/6<br>receptor | Millennium Pharmaceuticals                                                                | 7057017, 7579168, 7645451,<br>8202966, 20100093978                      |
| Dkk1 protein        | WNT FAMILY-DERIVED PEPTIDES AND USE THEREOF                                                                                        | Inhibition            | LRP5/6                             | CAREGEN CO., LTD.                                                                         | 20140309157                                                             |
| Dkk1 protein        | METHOD FOR PREPARING INDUCED PARAXIAL MESODERM PROGENITOR (IPAM) CELLS AND THEIR USE                                               | Inhibition            | LRP5/6                             | INSERM, ASSOCIATION FRANCAISE<br>CONTRE LES MYOPATHIES,<br>UNIVERSITE DE STRASBOURG, CNRS | 20140363886                                                             |
| DKK1 protein        | METHOD FOR FORMING ENDOTHELIAL CELLS                                                                                               | Inhibition            | LRP5/6                             | Korea Advanced Institute of Science<br>and Technology (KAIST)                             | 20150368617                                                             |
| Dkk1 and Dkk3 dsRNA | Compositions and methods for inhibiting cell migration                                                                             | Enhancer              | Dkk1/3                             | The Burnham Institute                                                                     | 7833980, 8039255                                                        |
| Dkk1 Antagonist     | Inhibitors of Dkk-1                                                                                                                | Enhancer              | Dkk1                               | Administrators of the Tulane<br>Educational Fund                                          | 20080085281                                                             |
| DKK1 antibody       | Use of Anti-DKK-1 Monoclonal Antibodies for the Treatment of Liver Cancer                                                          | Enhancer              | Dkk-1                              |                                                                                           | 20120201810                                                             |

| Compound/Category                           | Title or Example Thereof for Multiple Patents                      | Inhibitor or Enhancer | Molecular target | Assignee                                            | Patents and/or Patent Applications |
|---------------------------------------------|--------------------------------------------------------------------|-----------------------|------------------|-----------------------------------------------------|------------------------------------|
| DKK1 antibody                               | DKK1 ANTIBODIES AND METHODS OF USE                                 | Enhancer              | Dkk-1            |                                                     | 20130209475                        |
| DKK1 antibody                               | Antibodies to Dkk-1                                                | Enhancer              | Dkk1             | Amgen                                               | 7709611                            |
| DKK1 antibody                               | Treatment involving Dkk-1 or antagonists thereof                   | Enhancer              | Dkk1             | Genetech, Inc.                                      | 20030165501                        |
| DKK1 antibody                               | Antibodies that bind human Dickkopf-1 proteins                     | Enhancer              | Dkk1             | Millennium Pharmaceuticals                          | 7446181, 20100093056               |
| DKK1 antibody                               | Antibodies specific for Dkk-1                                      | Enhancer              | Dkk1             | Merck Sharp & Dohme Corp.                           | 7994293                            |
| DKK1 antibody and over-expression of Wnt-3a | Overexpression of Wnt ligands and treatment of lytic bone diseases | Enhancer              | Dkk1/wnt3-a      | The Board of Trustees of the University of Arkansas | 8501702                            |
| Dkk1 fragment                               | Compositions and methods for inhibiting cell migration             | Enhancer              | Dkk1             | The Burnham Institute                               | 7465585                            |
| DKK1 protein                                | INHIBITION OF HAIR FOLLICLE GROWTH BY THE WNT INHIBITOR DKK1       | Inhibition            | LRP5/6           |                                                     | 20120165270                        |
| Dkk1 protein                                | Differentiation of human embryonic stem cells                      | Inhibition            | LRP5/6           | LifeScan, Inc.                                      | 9096832                            |
| DKK1 protein                                | Molecules, Compositions and Methods to Treat Organ Scarring        | Inhibition            | LRP5/6           |                                                     | 20150337021                        |
| DKK1 shRNA or siRNA                         | shRNA Materials and Methods of Using Same for Inhibition of DKK-1  | Enhancer              | Dkk1             | The Regents of the University of Michigan           | 20080293053                        |
| Dkk1, Dkk2 protein                          | NOVEL METHODS TO REGENERATE HUMAN LIMBAL STEM CELLS                | Inhibition            | LRP5/6           | THE REGENTS OF THE UNIVERSITY OF CALIFORNIA         | 20150175965                        |
| Frizzled 7 expression                       | Frizzled proteins and detection and treatment of cancer            | Inhibition            | Frizzled-7       | Rhode Island Hospital                               | 7867705                            |

| Compound/Category                                           | Title or Example Thereof for Multiple Patents                                                                    | Inhibitor or Enhancer | Molecular target                   | Assignee                                                                                      | Patents and/or Patent Applications              |
|-------------------------------------------------------------|------------------------------------------------------------------------------------------------------------------|-----------------------|------------------------------------|-----------------------------------------------------------------------------------------------|-------------------------------------------------|
| Frizzled antibody (OMP-18R5) and Soluble Frizzled8          | Combination Therapy for Treatment of Cancer                                                                      | Inhibition            | Receptor                           |                                                                                               | 20150132301                                     |
| Frizzled antibody or polypeptide or lipid or small molecule | Frizzled-binding agents and their use in screening for WNT inhibitors                                            | Inhibition            | Frizzled                           | OncoMed Pharmaceuticals Inc.                                                                  | 8551789, 7982013, 8507442, 9168300, 20140242078 |
| Frizzled, Soluble                                           | Wnt antagonists and their use in the diagnosis and treatment of Wnt-mediated disorders                           | Inhibition            | Wnt                                | Genentech Inc.                                                                                | 7947277                                         |
| Frizzled, Soluble                                           | Use of FZC18-Containing Collagen 18 Polypeptides for the Treatment, Diagnosis and Outcome Prediction of Diseases | Inhibition            | Wnt ligands                        | INSERM, Paris                                                                                 | 20100316616                                     |
| Frizzled, Soluble                                           | Wnt antagonists and methods of treatment and screening                                                           | Inhibition            | Wnt ligands and Frizzled receptors | OncoMed Pharmaceuticals Inc.                                                                  | 9157904                                         |
| Frizzled, Soluble (FRP)                                     | Human FRP and fragments thereof including methods for using them                                                 | Inhibition            | Wnt ligands                        | USA dept Health and Human Services                                                            | 7183377                                         |
| Frizzled, Soluble (FRP)                                     | Polynucleotides encoding human FRP and fragments thereof                                                         | Inhibition            | Wnt ligands                        | USA dept Health and Human Services                                                            | 6479255                                         |
| Frizzled, Soluble (Frzb)                                    | Method of modulating tissue growth using Frzb Protein                                                            | Inhibition            | Wnt ligands                        | USA dept Health and Human Services                                                            | 6924367, 7049291, 7563596                       |
| Frizzled, Soluble (sFRP-1)                                  | Differentiation of stem cells into dopaminergic cells                                                            | Inhibition            | Frizzled                           | The United States of America, as represented by the Secretary, Department of Health and Human | 8628962                                         |
| Frizzled10 antibodies                                       | Anti-FZD10 monoclonal antibodies and methods for their use                                                       | Inhibition            | Frizzled-10                        | Omeros Corporation                                                                            | 9102724                                         |
| Frizzled3/8/9 antibodies and sFRP1/2/3                      | METHODS AND COMPOSITIONS FOR NERVE REGENERATION                                                                  | Inhibition            | Frizzled-3/8/9                     | The University of Chicago                                                                     | 20080299135                                     |
| Frizzled7 antibodies                                        | Wnt proteins and detection and treatment of cancer                                                               | Inhibition            | Frizzled-7                         | Rhode Island Hospital                                                                         | 8158761                                         |
| LPR5/6 Receptor antagonist (Apcdd peptide)                  | Use of WNT inhibitor to inhibit angiogenesis in the CNS                                                          | Inhibition            | LRP5 and Wnt3a                     |                                                                                               | 20110189097                                     |

| Compound/Category       | Title or Example Thereof for Multiple Patents                                                           | Inhibitor or Enhancer | Molecular target | Assignee                                           | Patents and/or Patent Applications                   |
|-------------------------|---------------------------------------------------------------------------------------------------------|-----------------------|------------------|----------------------------------------------------|------------------------------------------------------|
| LRP5/6 and Dkk proteins | Compounds and assays for controlling Wnt activity                                                       | Inhibition            | LRP5/6 and Dkk   | Enzo Biochem, Inc.                                 | 9052324                                              |
| LRP5/6 antibody         | Methods of using an antibody to inhibit WNT-mediated cardiac remodeling                                 | Inhibition            | LRP5/6           | Vanderbilt University                              | 8790650, 9175090, 9303087                            |
| LRP5/6 antibody         | Antibodies That Inhibit WNT Signaling and Methods of Using The Same                                     | Inhibition            | LRP5/6           |                                                    | 20120276089                                          |
| LRP6 antibody           | Anti-LRP6 antibodies                                                                                    | Inhibition            | LRP6             | Genentech, Inc.                                    | 8846041                                              |
| LRP6 antibody           | MOLECULES AND METHODS FOR MODULATING LOW-DENSITY-LIPOPROTEIN RECEPTOR-RELATED PROTEIN 6 (LRP6)          | Inhibition            | LRP6             | Novartis                                           | 20100254980                                          |
| LRP6 antibody           | Monoclonal antibodies that inhibit the wnt signaling pathway and methods of production and use thereof  | Inhibition            | LRP6             | The Board of Regents of the University of Oklahoma | 20120045437                                          |
| RSPO 1 protein          | COMPOSITIONS AND METHODS RELATING TO INDUCTION OF INTESTINAL STEM CELL HOMEODENESIS AND/OR REGENERATION | Enhancer              | ligand-Receptor  | The Regents of the University of Michigan          | 20160000865                                          |
| RSPO Antibody           | Anti-RSPO1 antibodies                                                                                   | Inhibition            | RSPO1            | Genentech, Inc.                                    | 8802097                                              |
| SOST antibody           | Antibodies that specifically bind SOST peptides                                                         | Enhancer              | SOST             | Stowers Institute for Medical Research             | 7893218, 7968301, 8168761, 8173125, 8546545, 9321835 |
| Tiki 1/2 antibodies     | Tiki1 and Tiki2, Wnt Inhibitors                                                                         | Enhancer              | Tiki1 and Tiki2  | Children's Medical Center Corp.                    | 20130101582                                          |
| Wnt 7a/b proteins       | WNT LIGANDS INVOLVED IN BLOOD-BRAIN BARRIER DEVELOPMENT AND USES THEREOF                                | Enhancer              | Frizzled         | President and Fellows of Harvard College           | 20100199362                                          |
| Wnt antibody            | Wnt and frizzled receptors as targets for immunotherapy in head and neck squamous cell carcinomas       | Inhibition            | Wnt1             | University of California Oakland                   | 7682607                                              |
| Wnt antibody            | Wnt and frizzled receptors as targets for immunotherapy in head and neck squamous cell carcinomas       | Inhibition            | Wnt14            | University of California Oakland                   | 7713526                                              |

| Compound/Category              | Title or Example Thereof for Multiple Patents                               | Inhibitor or Enhancer   | Molecular target                       | Assignee                                                       | Patents and/or Patent Applications |
|--------------------------------|-----------------------------------------------------------------------------|-------------------------|----------------------------------------|----------------------------------------------------------------|------------------------------------|
| Wnt antibody                   | METHODS FOR TREATING CANCER BY INHIBITING WNT SIGNALING                     | Inhibition              | Wnt1                                   | Regents of the University of California, Oakland               | 20090304695                        |
| Wnt antibody                   | WNT-Binding Agents and Uses Thereof                                         | Inhibition              | Wnt1,2,2b,3,3a,7a,7b,8a,8b,10a and 10b | OncoMed Pharmaceuticals Inc.                                   | 20130045209                        |
| Wnt antibody                   | Mammalian Wnt polypeptide-5                                                 | inhibition              | Wnt5                                   | ZymoGenetics Inc                                               | 20030017980                        |
| Wnt inhibitor polypeptide      | NON-ACTIVATED WNT INHIBITION POLYPEPTIDES AND METHOD FOR PREPARING THE SAME | Inhibition              | Wnt ligand                             |                                                                | 20090325866                        |
| Wnt polypeptides (Mini-Wnt)    | WNT COMPOSITIONS AND METHODS OF USE THEREOF                                 | Inhibition              | Frizzled and LRP5/6                    | The Board of Trustees of the Leland Stanford Junior University | 20140200179                        |
| Wnt protein                    | Use of Wnt Agents to Prevent Hypoxic Injury                                 | Enhancer                | Frizzled                               | The Board of Trustees of the Leland Stanford Junior University | 20140141061                        |
| Wnt receptor decoy (sLRP6E1E2) | ANTI-CANCER COMPOSITIONS CONTAINING WNT DECOY RECEPTOR                      | Inhibition              | Wnt ligand                             | INDUSTRY-UNIVERSITY COOPERATION FOUNDATION HANYANG UNIVERSITY  | 20140315825                        |
| Wnt-10 protein                 | WNT10-derived peptide and use thereof                                       | Enhancer                | Frizzled                               | Caregen Co., Ltd.                                              | 8497241                            |
| Wnt-5a peptide                 | Peptide ligand to impair cancer cell migration                              | Inhibition of Canonical | Receptor                               | Wntresearch AB                                                 | 8674060                            |
| Wnt-Fzd chimera                | Wnt-frizzled chimera                                                        | Enhancer                | Pathway activation                     | Wyeth                                                          | 20070072238                        |
| Wnt1/2/3a meroduplex RNA       | NUCLEIC ACID COMPOUNDS FOR INHIBITING WNT GENE EXPRESSION AND USES THEREOF  | Inhibition              | Wnt1/2/3A                              | MDRNA, Inc                                                     | 20100055784                        |
| Wnt3A protein                  | Use of liposomal Wnt composition to enhance osseointegration                | Enhancer                | Frizzled and LRP5/6                    | The Board of Trustees of the Leland Stanford Junior University | 8809272                            |
| Wnt3A protein                  | Methods of promoting cardiac cell proliferation                             | Enhancer                | Frizzled                               | Hydra                                                          | 20050261189                        |

| Compound/Category | Title or Example Thereof for Multiple Patents                    | Inhibitor or Enhancer | Molecular target    | Assignee                  | Patents and/or Patent Applications |
|-------------------|------------------------------------------------------------------|-----------------------|---------------------|---------------------------|------------------------------------|
| Wnt4a protein     | HLDAT86 polynucleotides                                          | not specified         | Frizzled receptors  | SmithKline Beecham P.L.C. | 6165751                            |
| Wnt7a polypeptide | WNT COMPOSITIONS AND THERAPEUTIC USES OF SUCH COMPOSITIONS       | Enhancer              | Frizzled and LRP5/6 | Fate Therapeutics Inc     | 20150099708, 20140142046           |
| Wnt7a protein     | COMPOSITIONS, METHODS AND KITS FOR DETECTING AND TREATING CANCER | Inhibition            | Frizzled            | University of Miami       | 20110039788                        |

Supplementary Table 1: USPTO Patent and Patent Applications  
beta-catenin P/PA

| Compound/Category                                               | Title or Example Thereof for Multiple Patents                                                        | Inhibitor or Enhancer  | Molecular target                          | Biomolecule or Chemical | Assignee                                       | Patents and/or Patent Applications                                                                         |
|-----------------------------------------------------------------|------------------------------------------------------------------------------------------------------|------------------------|-------------------------------------------|-------------------------|------------------------------------------------|------------------------------------------------------------------------------------------------------------|
| bc19 like protein w/ mutations                                  | .beta.-catenin nuclear localized protein                                                             | Inhibition             | $\beta$ -catenin                          | Biomolecule             | Kyowa Hakko Kogyo Co                           | 7358348                                                                                                    |
| BCL9 HD2 helix                                                  | TARGETING DEREGULATED WNT SIGNALING IN CANCER USING STABILIZED ALPHA-HELICES OF BCL-9                | Inhibition             | $\beta$ -catenin                          | Biomolecule             | Dana-Farber Cancer Institute Inc.              | 20140113857                                                                                                |
| compound                                                        | Compounds useful for treatment of cancer, compositions containing the same, and methods of their use | Inhibition             | $\beta$ -catenin-TCF4 -CBP complex        | Chemical                | Choongwae Pharma Corp                          | 6762185                                                                                                    |
| debromohymenialdesine (dBHD) and dBHD analogs                   | Wnt signaling inhibitors, and methods for making and using them                                      | Inhibition             | $\beta$ -catenin-TCF complex              | Chemical                | The Regents of the University of California    | 8304408                                                                                                    |
| disulfonamide derivatives                                       | Derivatives of fluorene, anthracene, xanthen, dibenzosuberone and acridine and uses thereof          | Inhibition             | $\beta$ -catenin                          | Chemical                | Dogwood Pharmaceuticals, Inc.                  | 8129519, 9120754                                                                                           |
| Dvl, Wnt, phosphatase PP2A, CK17, phosphatase inhibitors, FRAT1 | Methods and compositions for modulating beta-catenin phosphorylation                                 | Enhancer or Inhibition | $\beta$ -catenin phosphorylation on Ser45 | Biomolecule             |                                                | 20050171005                                                                                                |
| GSK3 inhibitor                                                  | ACTIVATED WNT-BETA-CATENIN SIGNALING IN MELANOMA                                                     | Enhancer               | $\beta$ -catenin                          | Chemical                | Yale University & University of Washington     | 20110293750                                                                                                |
| LXLL peptide                                                    | Compounds and methods for modulating .beta.-catenin mediated gene expression                         | Inhibition             | $\beta$ -catenin                          | Biomolecule             | Adherex Technologies                           | 6677116, 6303576                                                                                           |
| methods to modulate Fbp1 activity                               | NOVEL UBIQUITIN LIGASES AS THERAPEUTIC TARGETS                                                       | Inhibition             | $\beta$ -catenin                          | Biomolecule             | New York University                            | 20090104642, 20050079558                                                                                   |
| Nefopam                                                         | Method of treating scars and .beta.-catenin-mediated disorders using Nefopam compounds               | Inhibition             | $\beta$ -catenin                          | Chemical                | The Hospital for Sick Children                 | 8957107                                                                                                    |
| non-peptide reverse-turn mimics                                 | Reverse-turn mimetics and method relating thereto                                                    | Inhibition             | $\beta$ -catenin-TCF4 -CBP complex        | Chemical                | Choongwae Pharma Corp.                         | 8049008, 8729262, 8138337, 8318738, 7932384, 8101751, 8106049, 7232822, 7566711, 7576084, 7585862, 7671054 |
| oligomers (w specific formulas)                                 | Compounds for the modulation of beta-catenin expression                                              | Inhibition             | $\beta$ -catenin mRNA                     | Biomolecule             | Enzon Pharmaceuticals Inc. and Santaris Pharma | 7915401, 8039446                                                                                           |
| Oxazole and thiazole small molecules                            | Oxazole and thiazole compounds as beta-catenin modulators and uses thereof                           | Inhibition             | $\beta$ -catenin                          | Chemical                | New York University                            | 9173871, 8252823                                                                                           |
| peptides that bind $\beta$ -catenin such as cadherins           | Methods and therapeutic compositions for treating cancer                                             | inhibition             | $\beta$ -catenin                          | Biomolecule             | 2002                                           | 20020045591                                                                                                |
| peptidomimetic macrocycle (contains a helix)                    | PEPTIDOMIMETIC MACROCYCLES                                                                           | Inhibition             | $\beta$ -catenin-TCF4 -CBP complex        | Biomolecule             |                                                | 20130072439                                                                                                |

| Compound/Category              | Title or Example Thereof for Multiple Patents                                                                     | Inhibitor or Enhancer | Molecular target               | Biomolecule or Chemical | Assignee                                       | Patents and/or Patent Applications |
|--------------------------------|-------------------------------------------------------------------------------------------------------------------|-----------------------|--------------------------------|-------------------------|------------------------------------------------|------------------------------------|
| quinazoline derivatives        | AMINO-SUBSTITUTED QUINAZOLINE DERIVATIVES AS INHIBITORS OF BETA-CATENIN/TCF-4 PATHWAY AND CANCER TREATMENT AGENTS | Inhibition            | $\beta$ -catenin-TCF complex   | Chemical                | Wyeth                                          | 20090004185                        |
| RNAi agent                     | ORGANIC COMPOSITIONS TO TREAT BETA-CATENIN-RELATED DISEASES                                                       | Inhibition            | $\beta$ -catenin               | Biomolecule             | NOVARTIS AG                                    | 20150291954                        |
| RXR agonist                    | Methods and compositions for the treatment of cancer                                                              | Inhibition            | $\beta$ -catenin               | Chemical                | Allergan                                       | 20040009921                        |
| SIRT1 levels or activity       | SIRTUIN BASED METHODS AND COMPOSITIONS FOR TREATING BETA-CATENIN-RELATED CONDITIONS                               | Inhibition            | $\beta$ -catenin deacetylation | Biomolecule             | President and Fellows of Harvard College       | 20110009474                        |
| small molecule                 | CBP/CATENIN ANTAGONISTS FOR ENHANCING ASYMMETRIC DIVISION OF SOMATIC STEM CELLS                                   | Inhibition            | $\beta$ -catenin-CBP           | Chemical                | University of Southern California              | 20150232468                        |
| small molecules                | INHIBITORS OF BETA-CATENIN IN TREATMENT OF COLORECTAL CANCER                                                      | Inhibition            | $\beta$ -catenin-TCF4 complex  | Chemical                |                                                | 20150374662                        |
| stapled alpha-helical peptides | Beta-catenin targeting peptides and uses thereof                                                                  | Inhibition            | $\beta$ -catenin               | Biomolecule             | President and Fellows of Harvard College       | 8957026                            |
| TRPV4 inhibitor                | PROTEIN INVOLVED IN DETECTION OF CANCER METASTASIS AND A TREATMENT THEREOF                                        | Enhancer              | $\beta$ -catenin-E-cadherin    | Chemical                | National University of Singapore               | 20140199330                        |
| $\beta$ -catenin peptides      | Agents for treating human illnesses based on $\beta$ -catenin, and the production and use thereof                 | Inhibition            | $\beta$ -catenin-TCF complex   | Biomolecule             | Max-Delbruck-Centrum fur Molekulare Medizin    | 7067474                            |
| $\beta$ -catenin protein       | Methods for generating new hair follicles, treating baldness, and hair removal                                    | Enhancer              | $\beta$ -catenin               | Biomolecule             | The Trustees of the University of Pennsylvania | 9220926                            |



Supplementary Table 1: USPTO Patent and Patent Applications  
All others P/PA

| Compound/Category                                                                                    | Title                                                                                                                         | Inhibitor or Enhancer | Molecular target                       | Interaction at level of: | Assignee                                            | Patents and/or Patent Applications |
|------------------------------------------------------------------------------------------------------|-------------------------------------------------------------------------------------------------------------------------------|-----------------------|----------------------------------------|--------------------------|-----------------------------------------------------|------------------------------------|
| Tankerase inhibitors                                                                                 | 2-piperidin-1-yl-acetamide compounds for use as tankyrase inhibitors                                                          | Inhibition            | Axin1/2 via tankyrase                  | Axin1/2                  | Novartis                                            | 9181266, 9227982                   |
| Tankerase inhibitors                                                                                 | 4-piperidinyl compounds for use as tankyrase inhibitors                                                                       | Inhibition            | Axin1/2 via tankyrase                  | Axin1/2                  | Novartis AG                                         | 9163003                            |
| small molecule inhibitor                                                                             | 3-aryl-5-substituted-isoquinolin-1-one compounds and their therapeutic use                                                    | Inhibition            | PARP1, TNKS1, TNKS2, etc               | Axin1/2                  | Institute of cancer research: Royal Cancer Hospital | 9193689                            |
| small molecule inhibitor                                                                             | Pyrvinium For The Treatment of Cancer                                                                                         | Inhibition            | Pyrvinium                              | Axin1/2                  |                                                     | 20090099062                        |
| Azole derivatives                                                                                    | Azole derivatives as WNT pathway inhibitors                                                                                   | Inhibition            | stabilize Axin2/destruction complex    | Axin1/2                  | Oslo University Hospital HF                         | 8883827, 9096587                   |
| nucleic acid, fusion protein, compound                                                               | METHODS AND COMPOSITIONS FOR MEASURING WNT ACTIVATION AND FOR TREATING WNT-RELATED CANCERS                                    | Inhibition            | Tankyrase-Axin                         | Axin1/2                  | Novartis                                            | 20100267626                        |
| Casein kinase inhibitors                                                                             | BIFLUORODIOXALANE-AMINO-BENZIMIDAZOLE KINASE INHIBITORS FOR THE TREATMENT OF CANCER, AUTOIMMUNEINFLAMMATION AND CNS DISORDERS | Inhibition            | Casein kinase 1 family                 | Casein Kinase 1          | 4SC DISCOVERY GMBH                                  | 20150158878                        |
| CKI polypeptides                                                                                     | Compositions and methods of diagnosis and treatment using casein kinase I                                                     | Inhibition            | Wnt pathway                            | Casein Kinase 1          | Chiron Corporation                                  | 6512102                            |
| DACT3, Wnt ligand inhibitors (Dkk-1, WIF-1, SFRPs)                                                   | Methods and compounds for preventing and treating a tumour                                                                    | Inhibition            | DACT3: Dvl2,                           | Dishevelled              | Agency for Science, Technology and Research         | 8969313                            |
| 6-bromo-indirubin (BIO), 5-amino-indirubin and N-methyl-indirubins and related indirubin derivatives | Indirubin-Type Compounds, Compositions, and Methods for Their Use                                                             | Enhancer              | GSK3, CDKs, aryl hydrocarbon receptors | GSK3                     |                                                     | 20070276025                        |

Supplementary Table 2: Clinical Trials

| Number | Identifier  | Sponsor                              | Date Received | Condition                                                                                                                                             | Intervention               | target/method of action             | Aliases                    | Status       | Inhibition/Activation    | Phase               |
|--------|-------------|--------------------------------------|---------------|-------------------------------------------------------------------------------------------------------------------------------------------------------|----------------------------|-------------------------------------|----------------------------|--------------|--------------------------|---------------------|
| 1      | NCT02278133 | Array BioPharma                      | 06-Oct-14     | Metastatic CRC                                                                                                                                        | Wnt974                     | Porcupine                           |                            | recruiting   | Inhibition               | Phase 1<br>Phase 2  |
| 2      | NCT02649530 | University of Michigan Cancer Center | 05-Jan-16     | Squamous Cell Carcinoma, Head And Neck                                                                                                                | Wnt974                     | Porcupine                           |                            | Not yet open | Inhibition               | Phase 2             |
| 3      | NCT01351103 | Novartis Pharmaceuticals             | 04-May-11     | Pancreatic Adenocarcinoma; BRAF Mutant Colorectal Cancer; Other Tumor Types With Documented Genetic Alterations Upstream in the Wnt Signaling Pathway | LGK974                     | Porcupine                           |                            | Suspended    | Inhibition               | Phase 1             |
| 4      | NCT02413853 | University of Southern California    | 07-Apr-15     | Metastatic CRC                                                                                                                                        | PRI-724                    | CBP/ $\beta$ -catenin               |                            | not yet open | Inhibition               | Phase 2             |
| 5      | NCT01323894 | China Medical University Hospital    | 24-Mar-11     | Primary Disease (Osteoporosis*)                                                                                                                       | Wnt3a                      | Activation of Wnt/ $\beta$ -catenin |                            | Unknown      | Activation               | ?                   |
| 6      | NCT02020291 | WntResearch AB                       | 11-Dec-13     | Metastatic Breast Cancer; CRC; Prostate Cancer                                                                                                        | Foxy-5                     | Frizzled receptor                   | Wnt5a mimic                | completed    | Inhibition of metastases | Phase 1             |
| 7      | NCT01548066 | Seoul National University Hospital   | 20-Jul-11     | Androgenetic Alopecia; Male Pattern Baldness                                                                                                          | Valproic Acid              | GSK3b                               | Depakene                   | completed    | Activation               | Phase 2             |
| 8      | NCT01764477 | Prism Pharma Co., Ltd.               | 12-Dec-12     | Pancreatic Adenocarcinoma                                                                                                                             | PRI-724                    | CBP/ $\beta$ -catenin               |                            | completed    | Inhibition               | Phase 1             |
| 9      | NCT02655952 | WntResearch AB                       | 06-Jan-16     | Metastatic: Breast, Colon, Prostate Cancer                                                                                                            | Foxy-5                     | Frizzled receptor                   | Wnt5a mimic                | not yet open | Inhibition of metastases | Phase 1b            |
| 10     | NCT01398462 | JW Pharmaceutical                    | 17-Jul-11     | Acute Myeloid Leukemia                                                                                                                                | CWP232291                  | $\beta$ -catenin                    |                            | completed    | Inhibition               | Phase 1             |
| 11     | NCT02029352 | Maastricht University Medical Center | 18-Dec-13     | Basal Cell Carcinoma                                                                                                                                  | Topical Green Tea Ointment | Unspecified                         | epigallocatechin-3-gallate | completed    | inhibition               | Phase 2,<br>Phase 3 |

| <u>Number</u> | <u>Identifier</u> | <u>Sponsor</u>                                                   | <u>Date Received</u> | <u>Condition</u>                                           | <u>Intervention</u> | <u>target/method of action</u>             | <u>Aliases</u>      | <u>Status</u> | <u>Inhibition/Activation</u> | <u>Phase</u>       |
|---------------|-------------------|------------------------------------------------------------------|----------------------|------------------------------------------------------------|---------------------|--------------------------------------------|---------------------|---------------|------------------------------|--------------------|
| 12            | NCT02687009       | Michael Morse, MD                                                | 10-Feb-16            | Colon Cancer                                               | Niclosamide         | Frizzled receptor inhibitor                | Yomensan            | not yet open  | Inhibition                   | Phase 1            |
| 13            | NCT02675946       | Curegenix Inc                                                    | 22-Jan-16            | Advanced Solid Tumors (several)                            | CGX1321             | Porcupine*                                 |                     | recruiting    | Inhibition                   | Phase 1            |
| 14            | NCT00088387       | National Institute of Neurological Disorders and Stroke          | 23-Jul-04            | Alzheimer's Disease                                        | Lithium Divalproex  | GSK3b<br>GSK3b?                            | Depakote            | completed     | activation                   | Phase 2            |
| 15            | NCT02521844       | D3 (Drug Product and Development), Biomedical Sciences Institute | 27-Jul-15            | Solid Tumors                                               | ETC-1922159         | Porcupine                                  | ETC-159             | recruiting    | inhibition                   | Phase 1            |
| 16            | NCT01606579       | Prism Pharma Co., Ltd.                                           | 16-May-12            | Acute/Chronic Myeloid Leukemia                             | PRI-724             | CBP/ $\beta$ -catenin                      |                     | Ongoing       | Inhibition                   | Phase 1<br>Phase 2 |
| 17            | NCT01214603       | Eli Lilly and Company                                            | 29-Sep-10            | Leukemia                                                   | LY2090314           | GSK3                                       |                     | completed     | Activation                   | Phase 2            |
| 18            | NCT01302405       | Prism Pharma Co., Ltd.                                           | 18-Feb-11            | Advanced Solid Tumors                                      | PRI-724             | CBP/ $\beta$ -catenin                      |                     | terminated    | inhibition                   | Phase 1            |
| 19            | NCT01469975       | Centre Leon Berard                                               | 03-Nov-11            | Synovial Sarcoma                                           | OTSA101-DTPA-90Y    | Frizzled 10 neutralizing antibody          | OTSA101 (unlabeled) | ongoing       | Inhibition                   | Phase 1            |
| 20            | NCT02503137       | Samumed LLC                                                      | 16-Jul-15            | Androgenetic Alopecia                                      | SM04554             | Not specified                              |                     | ongoing       | Activation                   | Phase 2            |
| 21            | NCT01985763       | Randall F. Holcombe                                              | 09-Nov-13            | CRC                                                        | Genistein           | epigenetic modification of Sfrp2, Sfrp5and |                     | Recruiting    | Inhibition                   | Phase 1<br>Phase 2 |
| 22            | NCT01457417       | Leap Therapeutics                                                | 18-Oct-11            | Multiple Myeloma; Solid Tumors; Non-Small Cell Lung Cancer | DKN-01              | Dkk1 neutralizing antibody                 |                     | completed     | activation                   | Phase 1            |

| <u>Number</u> | <u>Identifier</u> | <u>Sponsor</u>                                                  | <u>Date Received</u> | <u>Condition</u>                                                                                                           | <u>Intervention</u> | <u>target/method of action</u>                 | <u>Aliases</u> | <u>Status</u> | <u>Inhibition/A ctivation</u> | <u>Phase</u>       |
|---------------|-------------------|-----------------------------------------------------------------|----------------------|----------------------------------------------------------------------------------------------------------------------------|---------------------|------------------------------------------------|----------------|---------------|-------------------------------|--------------------|
| 23            | NCT01608867       | OncoMed Pharmaceuticals, Inc.                                   | 29-May-12            | Solid Tumors                                                                                                               | OMP-54F28           | Wnt ligands                                    |                | Ongoing       | Inhibition                    | Phase 1            |
| 24            | NCT01197209       | Momotaro-Gene Inc.                                              | 03-Sep-10            | Prostate Cancer                                                                                                            | AD-REIC/Dkk3        | LRP5/6                                         | Dkk3           | withdrawn     | Inhibition                    | Phase 1            |
| 25            | NCT01931046       | Momotaro-Gene Inc.                                              | 21-Aug-13            | Localized Prostrate Cancer                                                                                                 | Ad5-SGE-REIC/Dkk-3  | LRP5/6                                         | Dkk3           | recruiting    |                               | Phase 1<br>Phase 2 |
| 26            | NCT02375880       | Leap Therapeutics                                               | 18-Feb-15            | Carcinoma of Intrahepatic and Extra-hepatic Biliary System; Carcinoma of Gallbladder; Bile Duct Cancer; Cholangiocarcinoma | DKN-01              | Dkk1 neutralizing antibody                     |                | recruiting    | activation                    | Phase 1            |
| 27            | NCT00741377       | Novartis Pharmaceuticals                                        | 22-Aug-08            | Multiple Myeloma Bone Disease                                                                                              | BHQ880              | Dkk1 neutralizing antibody                     |                | completed     | activation                    | Phase 1            |
| 28            | NCT01337752       | Novartis Pharmaceuticals                                        | 12-Apr-11            | Multiple Myeloma Renal Insufficiency                                                                                       | BHQ880              | Dkk1 neutralizing antibody                     |                | completed     | activation                    | Phase 2            |
| 29            | NCT01302886       | Novartis Pharmaceuticals                                        | 26-Jan-11            | Smoldering Multiple Myeloma                                                                                                | BHQ880              | Dkk1 neutralizing antibody                     |                | completed     | activation                    | Phase 2            |
| 30            | NCT01882660       | Academisch Medisch Centrum Universiteit van Amsterdam (AMC-UvA) | 24-May-13            | Colon Cancer                                                                                                               | Decitabine          | Wnt target genes derepression by demethylation |                | recruiting    | activation                    | Not Applicable     |
| 31            | NCT01293487       | Pfizer                                                          | 09-Feb-11            | Osteopenia; Osteoporosis; Bone Disease                                                                                     | RN564               | Dkk1 neutralizing antibody                     |                | completed     | activation                    | Phase 1            |
| 32            | NCT02013154       | Leap Therapeutics                                               | 11-Dec-13            | Esophageal Neoplasms; Adenocarcinoma of the Gastroesophageal Junction;. Gastroesophageal Cancer; Squamous Cell Carcinoma   | DKN-01              | Dkk1 neutralizing antibody                     |                | recruiting    | activation                    | Phase 1            |

| <u>Number</u> | <u>Identifier</u> | <u>Sponsor</u>    | <u>Date Received</u> | <u>Condition</u> | <u>Intervention</u> | <u>target/method of action</u> | <u>Aliases</u> | <u>Status</u> | <u>Inhibition/Activation</u> | <u>Phase</u>       |
|---------------|-------------------|-------------------|----------------------|------------------|---------------------|--------------------------------|----------------|---------------|------------------------------|--------------------|
| 33            | NCT01711671       | Leap Therapeutics | 18-Oct-12            | Multiple Myeloma | DKN-01              | Dkk1 neutralizing antibody     |                | completed     | activation                   | Phase 1<br>Phase 2 |
| 34            | NCT01457417       | Leap Therapeutics | 18-Oct-11            | Multiple Myeloma | DKN-01              | Dkk1 neutralizing antibody     |                | completed     | activation                   | Phase 1            |
